# Supplementary material for: A novel fluorous effect induced fluorescence sensor for Cu(ii) detection in the organic phase with high sensitivity
Source: Royal Society of Chemistry journal article supplement (doi:10.1039/d1qm00307k), 2021-01-01
Supplement: d1qm00307k1.pdf [file d1qm00307k1.pdf]

# Supplementary Information

## A Novel Fluorous Effect Induced Fluorescence Sensor for Cu(II) Detection in Organic Phase with High Sensitivity

Honghong Gong, Yipin Cheng, Ying Zhang, Jie Xiong, Zhicheng Zhang\*

Xi'an Key Laboratory of Sustainable Energy Materials Chemistry, Department of Applied Chemistry, School of Chemistry, Xi'an Jiaotong University, Xi'an, 710049, Shaanxi Province, P. R. China. E-mail: zhichengzhang@mail.xjtu.edu.cn

### 1. FTIR characterization

The FTIR spectrum of P(VDF-CTFE) and P(VDF-ATrFE) was show in Fig. S1. The characteristic peak at  $2147\text{ cm}^{-1}$ , assigned to the azido stretching, is observed in the resultant copolymer. The absorption band at  $1724\text{ cm}^{-1}$  in the P(VDF-ATrFE) may address the existence of  $-\text{CF}=\text{CH}-$ . Meanwhile, the intensity of the absorption band of P(VDF-CTFE) at  $760\text{ cm}^{-1}$  (C-Cl bond) is remarkably decreased after reacted with  $\text{NaN}_3$ .

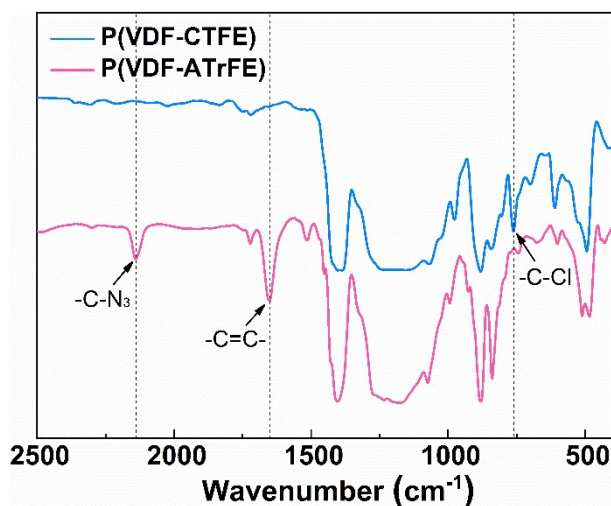

Fig. S1. FTIR spectrum of P(VDF-CTFE) before (line in blue) and after reacted with  $\text{NaN}_3$  (line in red)

## 2. The order of complexing equilibrium constants of BPy, PMDETA and $\text{Me}_6\text{-TREN}$ with $\text{CuCl}_2$ through computer simulation

Theoretical Method: M062X/6-31G\*

Solvation Model: standard SMD with radii=Bondi

The calculation simulation results were shown in Table S1 and the structure information was shown in Table S2.

Table S1 Free energy and stabilization constant in DMF by SMD model.

| Reaction                                                                                                             | $G_{\text{stab-sol}}$<br>(kcal/mol) | $K_{\text{stab-sol}}$ |
|----------------------------------------------------------------------------------------------------------------------|-------------------------------------|-----------------------|
| $\text{Cu}(\text{DMF})_6 + 2\text{N}_2\text{L} \rightarrow \text{Cu}(\text{N}_2\text{L})_2 + 6\text{DMF}$            | 16.8                                | 5.91E-13              |
| $\text{Cu}(\text{DMF})_6 + \text{N}_3\text{L} \rightarrow \text{Cu}(\text{N}_3\text{L})(\text{DMF})_3 + 3\text{DMF}$ | -2.7                                | 8.80E+01              |
| $\text{Cu}(\text{DMF})_6 + \text{N}_4\text{L} \rightarrow \text{Cu}(\text{N}_4\text{L})(\text{DMF})_2 + 4\text{DMF}$ | 0.5                                 | 4.02E-01              |

\* $\text{N}_2\text{L}$ ,  $\text{N}_3\text{L}$ ,  $\text{N}_4\text{L}$  respectively represent BPy, PMDETA and  $\text{Me}_6\text{TREN}$ .

Table S2 The molecular structure and possible complex structure.

|                                                                                     |                                                                                      |
|-------------------------------------------------------------------------------------|--------------------------------------------------------------------------------------|
| DMF                                                                                 | BPy ( $N_2L$ )                                                                       |
| 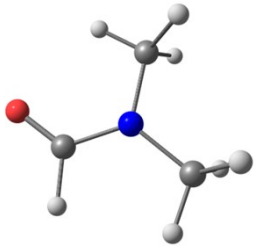   |    |
| PMDETA ( $N_3L$ )                                                                   | Me <sub>6</sub> TREN ( $N_4L$ )                                                      |
|    |   |
| $Cu(N_2L)_2$                                                                        | $Cu(N_3L)(DMF)_3$                                                                    |
|  |  |
| $Cu(N_4L)(DMF)$                                                                     |                                                                                      |
|  |                                                                                      |
